# Supplementary material
Source: PubMed Central journal article supplement (PMC3013050)
Supplement: supp_M110.153247_jbc.M110.153247-1.pdf [file supp_M110.153247_jbc.M110.153247-1.pdf]

**Supplementary Table I:** *List of primary and secondary antibodies utilized in this study*

| <b>Antibody</b>                                 | <b>Host Species</b> | <b>Source</b>                                     | <b>Catalog</b> | <b>Dilution</b> |
|-------------------------------------------------|---------------------|---------------------------------------------------|----------------|-----------------|
| 34C (RyR1/3)                                    | Mouse               | Iowa Hybridoma Bank,<br>culture media             | N/A            | 1:500           |
| Acetyl-CoA Carboxylase                          | Rabbit              | Cell Signaling                                    | 3676           | 1:1,000         |
| Phospho-Acetyl-CoA<br>Carboxylase (Ser79)       | Rabbit              | Cell Signaling                                    | 3661           | 1:1,000         |
| Actin                                           | Goat                | Santa Cruz                                        | sc-1615        | 1:5,000         |
| AMPK $\alpha$                                   | Rabbit              | Cell Signaling                                    | 2603           | 1:1,000         |
| Phospho-AMPK $\alpha$ (Thr172)                  | Rabbit              | Cell Signaling                                    | 2535           | 1:1,000         |
| Complex II, 70 kDa subunit                      | Mouse               | Molecular Probes                                  | A11142         | 1:10,000        |
| Cytochrome <i>c</i>                             | Mouse               | 7H8.2C12 Ascites                                  |                | 1:1,000         |
| Cytochrome <i>c</i> oxidase subunit I           | Mouse               | Santa Cruz                                        | sc-58347       | 1:200           |
| Cytochrome <i>c</i> oxidase subunit II          | Mouse               | Molecular Probes                                  | A6404          | 1:2,000         |
| F <sub>1</sub> -ATPase $\beta$ subunit          | Mouse               | BD Biosciences                                    | 612518         | 1:5,000         |
| MnSOD                                           | Rabbit              | Upstate                                           | 06-984         | 1:5,000         |
| Myoglobin                                       | Goat                | Santa Cruz                                        | sc-8081        | 1:100           |
| NDUFS2 (IP49K)                                  | Rabbit              | Gift from Mutsuo Yamaguchi<br>(Scripps Institute) | N/A            | 1:1,000         |
| Nitrotyrosine                                   | Mouse               | Upstate                                           | 05-233         | 1:2,000         |
| p44/42 MAPK (Erk1/2)                            | Rabbit              | Cell Signaling                                    | 9102           | 1:1,000         |
| Phospho-p44/42 MAPK (Erk1/2)<br>(Thr202/Tyr204) | Mouse               | Cell Signaling                                    | 9106           | 1:1,000         |
| PKC $\epsilon$                                  | Rabbit              | Cell Signaling                                    | 2683S          | 1:1,000         |
| Phospho-PKC (pan) ( $\beta$ II Ser660)          | Rabbit              | Cell Signaling                                    | 9371           | 1:1,000         |
| PKC $\alpha$                                    | Rabbit              | Cell Signaling                                    | 2056           | 1:1,000         |
| Phospho-PKC $\alpha/\beta$ II (Thr638/641)      | Rabbit              | Cell Signaling                                    | 9375           | 1:1,000         |
| Phospho-PKC $\delta$ (Thr505)                   | Rabbit              | Cell Signaling                                    | 9374           | 1:1,000         |
| Phospho-PKC $\delta/\theta$ (Ser643/676)        | Rabbit              | Cell Signaling                                    | 9376           | 1:1,000         |
| Phospho-PKC $\zeta/\lambda$ (Thr410/403)        | Rabbit              | Cell Signaling                                    | 9378           | 1:1,000         |
| Phospho-PKC $\theta$ (Thr538)                   | Rabbit              | Cell Signaling                                    | 9377           | 1:1,000         |
| PKD/PKC $\mu$                                   | Rabbit              | Cell Signaling                                    | 2052           | 1:1,000         |
| Phospho-PKD/PKC $\mu$ (Ser744/748)              | Rabbit              | Cell Signaling                                    | 2054           | 1:1,000         |
| Phospho-PKD/PKC $\mu$ (Ser916)                  | Rabbit              | Cell Signaling                                    | 2051           | 1:1,000         |
| PP2B-A                                          | Rabbit              | Santa Cruz                                        | sc-9070        | 1:200           |
| RCAN-1 (DSCR-1)                                 | Rabbit              | Santa Cruz                                        | sc-66864       | 1:10,000        |
| VDAC1                                           | Goat                | Santa Cruz                                        | sc-8828        | 1:200           |
| Anti-Mouse HRP                                  | Goat                | Zymed                                             | 62-6520        | 1:5,000         |
| Anti-Goat HRP                                   | Donkey              | Santa-Cruz                                        | sc-2020        | 1:1,000         |
| Anti-Rabbit HRP                                 | Goat                | Cell Signaling                                    | 7074           | 1:2,000         |
